# Supplementary material
Source: PeerJ journal article supplement (doi:10.7717/peerj-cs.3688)
Supplement: Readme.docx [file Readme.docx]

**ECIA: Emotional-Cognition Integration Architecture**

This repository contains the official implementation of the paper: **"Biologically-Inspired Emotional Processing for Adaptive Decision-Making in Non-Stationary Environments"**

**Overview**

The **Emotional-Cognition Integration Architecture (ECIA)** is a biologically-inspired reinforcement learning framework designed to manage environmental uncertainty. Unlike traditional methods that utilize statistical thresholds, this study demonstrates that emotion-like mechanisms (External Limbic System) function as **adaptive heuristics** for rapid uncertainty management.

This codebase reproduces the **large-scale experimental replication (N=3,600 runs)** reported in the manuscript, comparing ECIA against state-of-the-art non-stationary baselines.

**Key Features**

- **Biologically-Inspired Architecture:** Implements 8 computational emotions (Plutchik's wheel), episodic memory retrieval, and dopamine-modulated learning rates.
- **Non-Stationary Environments:**
  - Environment A: Sudden Strategy Reversal (Shock)
  - Environment B: Predictable Alternation (Cyclic)
  - Environment C: Stochastic Disruptions (High Uncertainty)
- **Improved Baselines:**
  - Sliding Window UCB (SW-UCB)
  - Adaptive Thompson Sampling (Adaptive TS)
  - Context-Aware Epsilon-Greedy
- **Computational Tractability:** Optimized for standard research workstations.

**System Requirements & Replication**

All experiments in the paper were conducted using the following specifications:

- **OS:** Windows 10 Pro
- **CPU:** Intel Core i7-6700 CPU @ 3.40GHz
- **RAM:** 16GB
- **Python Version:** 3.8

The simulation relies on **12 specific Fibonacci seeds** (34, 55, ..., 6765) to ensure statistical robustness and reproducibility of the reported results.

**Installation**

1. Clone the repository:
2. git clone https://github.com/DrKDH/PeerjCS.git

cd PeerjCS

1. Install dependencies:

pip install -r requirements.txt

**Usage**

To run the full simulation suite and generate the performance metrics:

python ECIA_improved.py

- **Execution Time:** Approximately 20-30 minutes for the full suite (3,600 runs).
- **Outputs:** The script will generate CSV files containing mean rewards and recovery metrics, corresponding to the Tables and Figures in the manuscript.

**Main Findings Replicated**

Running this code will reproduce the following key findings:

1. **Functional Specialization:** ECIA statistically outperforms baselines in uncertain/stochastic environments (Env A & C).
2. **Cost of Complexity:** Simpler baselines (like SW-UCB) outperform ECIA in strictly predictable environments (Env B).
3. **Synergistic Integration:** Ablation studies demonstrate that removing components (Emotion, Memory, Dopamine) causes non-additive performance degradation.

**License**

This project is open-source and available for academic and research purposes.
